# Supplementary material
Source: PubMed Central journal article supplement (PMC11108403)
Supplement: 18_2015_2057_MOESM1_ESM.pdf [file 18_2015_2057_MOESM1_ESM.pdf]

## **Supplementary Material**

### **Inhibition of the tyrosine phosphatase STEP<sub>61</sub> restores BDNF expression and reverses motor and cognitive deficits in phencyclidine treated mice**

Jian Xu, Pradeep Kurup, Tyler D. Baguley, Ethan Foscue, Jonathan A. Ellman, Angus C. Nairn,

Paul J. Lombroso

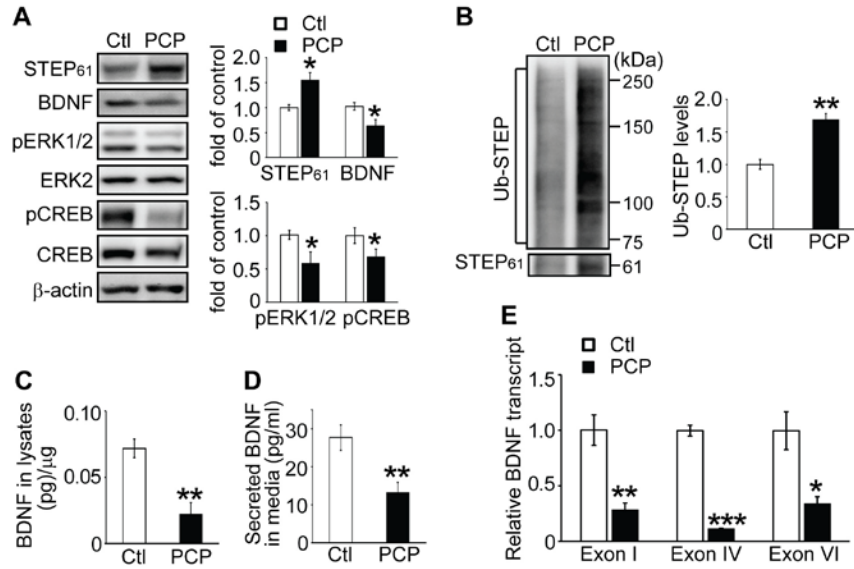

**Figure S1** Elevated STEP<sub>61</sub> correlates with decreased BDNF protein and BDNF mRNA

expression. **A** Cortical neurons were treated with PCP (10 μM) for 24 h. STEP<sub>61</sub> and its substrates were probed with phospho-specific or pan-antibodies, and phospho-levels were normalized to total protein levels and then to β-actin as loading control. **B** PCP treatment leads to increased ubiquitination of STEP<sub>61</sub> in culture. BDNF levels in lysates (**C**) and culture media (**D**) were assayed using ELISA. **E** mRNA levels of three BDNF transcripts (Exon I, IV and VI) were measured using quantitative real-time PCR. Target expression levels were normalized to GAPDH as internal control. All data were expressed as mean ± SEM and statistical significance was determined using Student's *t*-test (\**p* < 0.05, \*\**p* < 0.01; *n* = 6 independent batches of cultures for **A**, **B** and **E**; *n* = 8 independent batches of cultures for **C** and **D**)

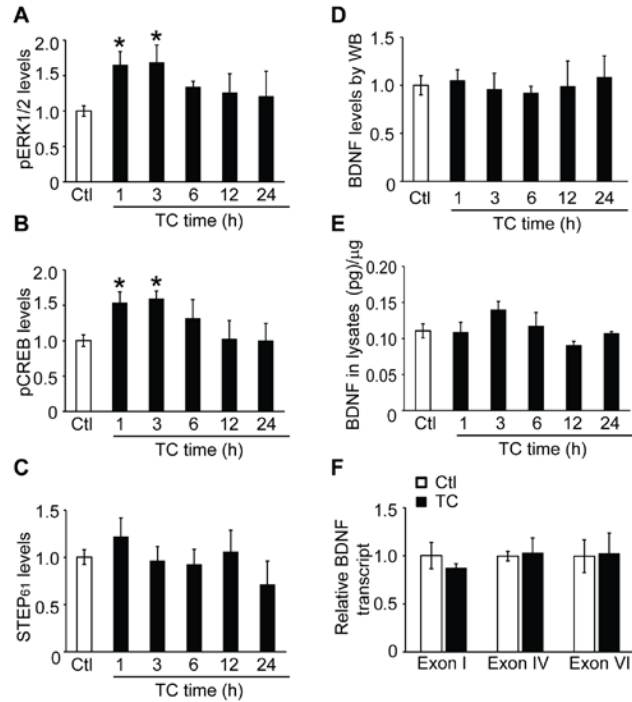

**Figure S2** TC-2153 alone did not alter BDNF protein or mRNA levels. Cortical neurons were treated with TC-2153 (1  $\mu$ M) for 1-24 h. After treatments, neurons were lysed in 1 $\times$ RIPA buffer for western blotting. TC-2153 induced a transient increase in pERK1/2 (**A**) and pCREB (**B**) levels, without changing total level of STEP<sub>61</sub> (**C**) or BDNF (**D**) protein levels in lysates. **E** TC-2153 treatment did not alter BDNF levels as measured by ELISA. **F** Separate cultures were treated with TC-2153 (1  $\mu$ M) for 24 h, lysed using the RNeasy kit for RNA extraction and processed for quantitative real-time PCR (qRT-PCR) mRNA levels of 3 BDNF transcripts (Exon I, IV and VI) were measured using qRT-PCR. Target expression levels were normalized to GAPDH as internal control. All data were expressed as mean  $\pm$  SEM and statistical significance determined by one-way ANOVA with *post hoc* Bonferroni's test (for **A-E**) or Student's t test (for **F**) (\* $p < 0.05$ ;  $n = 6$  independent batches of cultures for all groups)

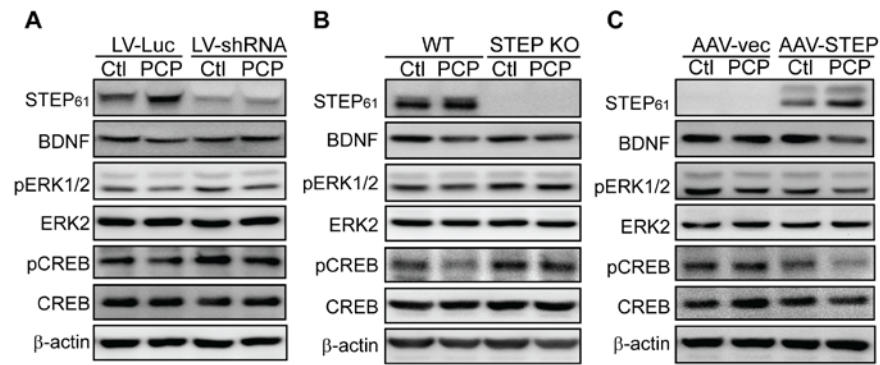

**Figure S3** Representative western blots for histograms shown in Figure 3. **A** STEP<sub>61</sub> knockdown attenuates PCP-induced decreases in BDNF. Cortical neurons were infected with lentivirus containing luciferase vector (LV-Luc) or STEP shRNA (LV-shRNA) for 7 days, followed by control or PCP (10 μM) for 24 h. **B** Cultured cortical neurons from WT or STEP KO mice were treated with control or PCP (10 μM) for 24 h. **C** Cortical neurons from STEP KO mice were infected with AAV1/2 control vector (AAV-vector) or STEP<sub>61</sub> (AAV-STEP<sub>61</sub>) for 7 days, followed by control or PCP treatment. Neurons were lysed after treatment and subjected to western blotting

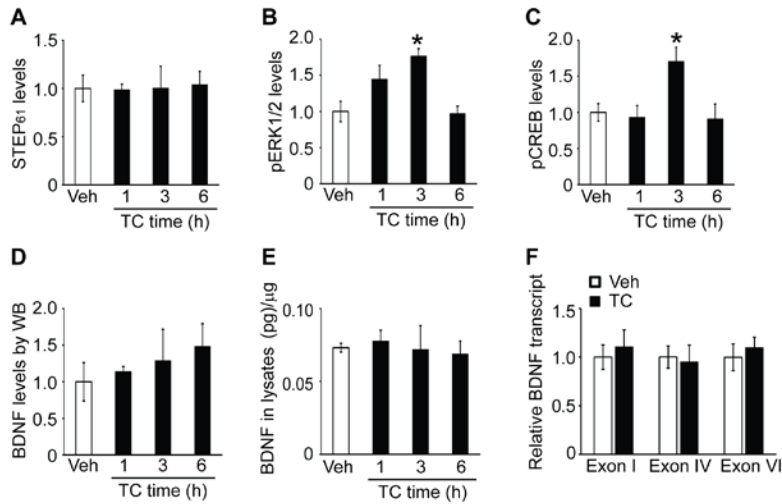

**Figure S4** TC-2153 did not alter BDNF protein or mRNA levels *in vivo*. Male C57BL/6 mice were administrated with TC-2153 (10 mg/kg, i.p.) and sacrificed 1-6 h later. Frontal cortex was processed for biochemical analysis. **A** TC-2153 administration did not alter total STEP<sub>61</sub> levels. **B, C** TC-2153 administration resulted in a transient increase of pERK1/2 (**B**) and pCREB (**C**) levels. **D, E** TC-2153 administration did not change BDNF expression. BDNF protein levels were measured by western blotting (**D**) and ELISA (**E**). **F** mRNA levels of 3 BDNF transcripts (Exon I, IV and VI) were measured 6 h after TC-2153 injection using quantitative real-time PCR. Data were expressed as mean  $\pm$  SEM and statistical significance determined by one-way ANOVA with *post hoc* Bonferroni's test (for **A-E**) or Student's *t*-test (for **F**) (\* $p < 0.05$ ;  $n = 4$  C57BL/6 mice for all groups)

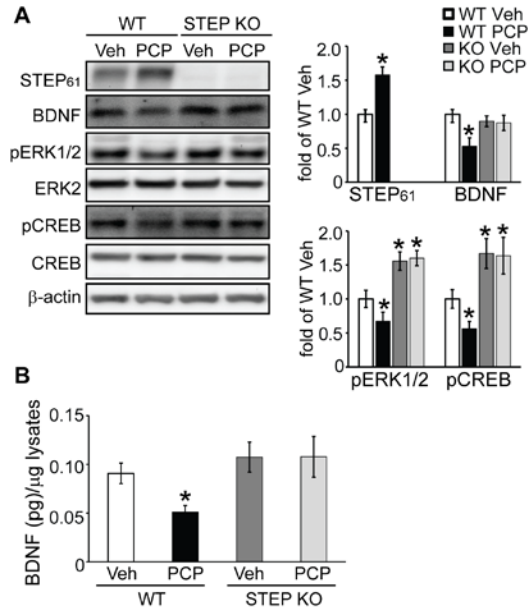

**Figure S5** No detectable reduction in BDNF expression in STEP KO mice after acute administration of PCP. **A** Male WT and STEP KO mice (4-6 months old) were treated with PCP (7.5 mg/kg, i.p.) for 1 h. Tissues from frontal cortices were processed by western blotting. Proteins were probed with phospho-specific- or pan-antibodies, and phospho-levels were normalized to total protein levels, and then to  $\beta$ -actin as loading control. **B** BDNF levels were also measured by ELISA. Data were expressed as mean  $\pm$  SEM and statistical significance determined using one-way ANOVA with *post hoc* Bonferroni's test ( $*p < 0.05$ ,  $n = 6$  mice per group)

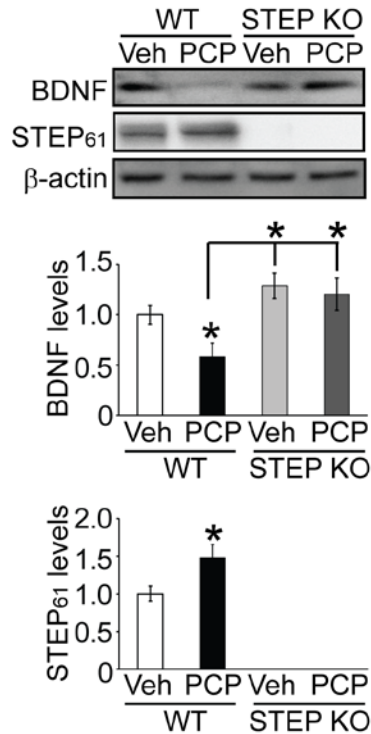

**Figure S6** Genetic reduction of STEP prevents PCP-induced reduction of BDNF during NOR consolidation. Male WT and STEP KO mice (3-6 months old) were administered vehicle (Veh) or PCP (5 mg/kg, i.p., twice daily for 5 days, followed by 1 week break). Mice were trained in the NOR task with two identical objects. Nine hours post-training, hippocampi were collected for western blotting. Data were expressed as mean  $\pm$  SEM. Two-way ANOVA with *post hoc* Bonferroni's test (for BDNF) and Student's *t*-test (for STEP<sub>61</sub>) were performed to determine statistical significance (\* $p < 0.05$ ,  $n = 6$  mice per group)

**Supplementary Table 1. Antibodies used in this study.**

| Antibody            | Immunogen                                                         | Host   | Dilution | Source                                   |
|---------------------|-------------------------------------------------------------------|--------|----------|------------------------------------------|
| anti-STEP           | Residues around Ile <sup>440</sup> of human STEP <sub>61</sub>    | rabbit | 1:1000   | Cell Signaling Technologies, Danvers, MA |
| anti-STEP (23E5)    | N-terminal of rat STEP <sub>46</sub>                              | Mouse  | 1:1000   | Santa Cruz Biotechnology, Santa Cruz, CA |
| anti-BDNF           | An internal region of human BDNF                                  | rabbit | 1:500    | Santa Cruz Biotechnology                 |
| anti-pERK1/2        | Synthetic phosphopeptide around Tyr <sup>204</sup> of human ERK   | mouse  | 1:1000   | Santa Cruz Biotechnology                 |
| anti-ERK2           | C-terminus of rat ERK2                                            | rabbit | 1:5000   | Santa Cruz Biotechnology                 |
| anti-pCREB          | Synthetic phosphopeptide around Ser <sup>133</sup> of human CREB  | rabbit | 1:1000   | Cell Signaling Technologies              |
| anti-CREB           | N-terminus of human CREB                                          | rabbit | 1:1000   | Cell Signaling Technologies              |
| anti-phopsho-GluN2B | Synthetic phosphopeptide around Tyr <sup>1472</sup> of rat GluN2B | rabbit | 1:1000   | Millipore, Billerica, MA                 |
| anti-GluN2B         | C-terminus (aa 1463-1482) of mouse GluN2B                         | rabbit | 1:1000   | Millipore                                |
| anti-phospho-Pyk2   | Synthetic phosphopeptide around Tyr <sup>402</sup> of human Pyk2  | rabbit | 1:1000   | Cell Signaling Technologies              |
| anti-Pyk2           | C-terminus of human Pyk2                                          | mouse  | 1:1000   | Cell Signaling Technologies              |
| anti-ubiquitin      | Ubiquitin purified from bovine red blood cells                    | rabbit | 1:5000   | Thermo Scientific, Fremont, CA           |
| anti-β-actin        | gizzard Actin of avian origin                                     | mouse  | 1:5000   | Santa Cruz Biotechnology                 |
| anti-rabbit IgG     | rabbit IgG (H+L), Peroxidase Conjugated                           | goat   | 1:5000   | Thermo Scientific                        |
| anti-mouse IgG      | mouse IgG (H+L), Peroxidase Conjugated                            | goat   | 1:5000   | Thermo Scientific                        |
